# Supplementary material
Source: PubMed Central journal article supplement (PMC3075440)
Supplement: NIHMS255197-supplement-1.pdf [file NIHMS255197-supplement-1.pdf]

List of Speakers at the First Tianjin, China Forum on Tumor Microenvironment

| Speaker                 | Institute                                                                  | City                     | Country     |
|-------------------------|----------------------------------------------------------------------------|--------------------------|-------------|
| Xu Cao, PhD             | Johns Hopkins Medical Center                                               | Baltimore, MD            | USA         |
| Chawnshang Chang, PhD   | University of Rochester Medical Center                                     | Rochester, NY            | USA         |
| Jilong Chen, PhD        | Institute of Microbiology, Chinese Academy of Sciences                     | Beijing                  | China       |
| Shi-Yuan Cheng, PhD     | University of Pittsburgh                                                   | Pittsburgh, PA           | USA         |
| YiFan Dai, MD, PhD      | Nankai University                                                          | Tianjin                  | China       |
| Wolf Fridman, PhD       | University Pierre et Marie                                                 | Paris                    | France      |
| Li Fu, MD, PhD          | Tianjin Medical University                                                 | Tianjin                  | China       |
| Yu Jiang, PhD           | University of Pittsburgh                                                   | Pittsburgh, PA           | USA         |
| Evan Keller, PhD        | University of Michigan Medical Center                                      | Ann Arbor, MI            | USA         |
| Robert Kerbel, PhD      | University of Toronto                                                      | Toronto                  | Canada      |
| Jiajun Li, Commissioner | Tianjin Municipality Science and Technology Commission                     | Tianjin                  | China       |
| Luyuan Li, PhD          | Nankai University                                                          | Tianjin                  | China       |
| Mengfeng Li, PhD        | Sun Yat-sen University                                                     | Guangzhou                | China       |
| Michael Lotze, MD, PhD  | University of Pittsburgh                                                   | Pittsburgh, PA           | USA         |
| Yongzhang Luo, PhD      | Tsinghua University                                                        | Beijing                  | China       |
| Duanqing Pei, PhD       | Guangzhou Institute of Biomedicine and Health, Chinese Academy of Sciences | Guangzhou                | China       |
| Jeffery Pollard, PhD    | Albert Einstein College of Medicine                                        | Bronx, NY                | USA         |
| Zhihai Qin, MD          | Institute of Biophysics, Chinese Academy of Sciences,                      | Beijing,                 | China       |
| Zihe Rao, PhD           | Nankai University                                                          | Tianjin                  | China       |
| David Roodman, MD, PhD  | University of Pittsburgh                                                   | Pittsburgh, PA           | USA         |
| Tuomas Tammela, MD, PhD | University of Helsinki                                                     | Helsinki                 | Finland     |
| Cun-Yu Wang, PhD        | University of California                                                   | Los Angeles, CA          | USA         |
| Zhou Wang, PhD          | University of Pittsburgh                                                   | Pittsburgh, PA           | USA         |
| Isaac Witz, PhD         | Tel Aviv University                                                        | Tel Aviv                 | Israel      |
| Guozhi Xiao, MD, PhD    | University of Pittsburgh and Nankai University                             | Pittsburgh, PA / Tianjin | USA / China |
| Zhi-Xiong Xiao, PhD     | Sichuan University                                                         | Chengdu, Sichuan         | China       |
| Zhi Yao, MD, PhD        | Tianjin Medical University                                                 | Tianjin                  | China       |
| Zhinan Yin, PhD         | Nankai University                                                          | Tianjin                  | China       |
| Bruce Zetter, PhD       | Harvard Medical School                                                     | Boston, MA               | USA         |
| Qimin Zhan, MD, PhD     | Peking Union Medical College                                               | Beijing                  | China       |
| Jian Zhang, MD, PhD     | University of Michigan                                                     | Ann Arbor, MI            | USA         |
| Limin Zheng, MD, PhD    | Sun Yat-sen University                                                     | Guangzhou                | China       |
